# 1 **Olfactory host entry supports herpesvirus recombination**

2

## 3 **Authors**

4 Wanxiaojie Xie<sup>1</sup>, Kimberley Bruce<sup>1</sup>, Helen E. Farrell<sup>1,2</sup>, Philip G. Stevenson<sup>1,2#</sup>

5

## 6 **Affiliations**

7 <sup>1</sup>School of Chemistry and Molecular Biosciences, University of Queensland, Brisbane, Australia.

8 <sup>2</sup>Child Health Research Center, University of Queensland, South Brisbane, Australia.

9

10 #Correspondence: Dr Philip Stevenson; School of Chemistry and Molecular Biosciences, University  
11 of Queensland, St Lucia, 4072, Queensland, Australia; email: p.stevenson@uq.edu.au.

12

# **13 Abstract**

14        Herpesvirus genomes record abundant recombination. Its impact on infection remains ill-  
15 defined. When co-infecting mice by the natural olfactory route, individually incapacitated Murid  
16 Herpesvirus-4 (MuHV-4) mutants routinely recombined to restore normal host colonization. Lung  
17 infection rescued much less well. Murine cytomegalovirus mutants deficient in salivary gland  
18 colonization also showed rescue via the nose but not the lungs. As nose and lung infections show  
19 similar spread, efficient recombination seemed specific to olfactory entry. Rescue of replication-  
20 deficient MuHV-4 implied co-infection of the first encountered cells, and this worked also with  
21 asynchronous inoculation, suggesting that latent virus could lie in wait for later reactivation. Inhaled  
22 MuHV-4 is commonly caught on respiratory mucus, which epithelial cilia push back towards the  
23 olfactory surface, and infection was correspondingly frequent at the anterior olfactory edge. Thus  
24 olfactory entry provides a general means for herpesviruses to meet.

25

26

## 27 **Author summary**

28 Inter-strain recombination allows viruses to optimise infection in diverse hosts. Many herpesviruses  
29 show past recombination. Yet they are ancient pathogens, so this past may be remote and  
30 recombination rare. Diverse herpesviruses enter new hosts via olfactory cells. We show that such  
31 entry routinely allows recombination between co-infecting virus strains, even when one strain  
32 cannot spread. Recombination was contrastingly rare after lung infection. Thus, entry via olfactory  
33 cells specifically supports frequent herpesvirus recombination.

34

35

## 36 Introduction

37 Outbred hosts subject viruses to serial changes in selection. Herpesviruses, with proof-  
38 reading polymerases, are slow to make new mutations [1]. Nonetheless some human  
39 cytomegalovirus (HCMV) and Herpes simplex virus type 1 (HSV-1) genes display marked diversity,  
40 including disruption [2, 3]. The latency genes of Epstein-Barr virus (EBV) also vary greatly [4]. Ancient  
41 diversity plus present stability gives herpesvirus genes allelic forms, which interact with host alleles  
42 to influence infection outcomes. For example the murine cytomegalovirus m157 evolved to inhibit  
43 NK cells [5], but in Ly49H<sup>+</sup> mice delivers instead disadvantageous activation [6, 7].

44 Herpesvirus strains often co-infect [2-4], and genome sequences show that co-infections  
45 must have met to make recombinants [8-11]. However each infection is dilute, and immunogenicity  
46 creates inter-strain competition. Longitudinal analysis has identified likely instances of HCMV  
47 recombination [12], but in immunodeficient hosts with high viral loads and susceptibility to re-  
48 infection. While EBV co-infection is common in infectious mononucleosis [13], that is 1-3 months  
49 after entering an immunocompetent host [14], serial strain typing has been limited to single loci.  
50 Thus it is unclear whether divergent strains co-infect cells frequently enough to form functional gene  
51 pools, or whether recombination rarely alters outcomes.

52 Recombination seems most likely to result in early infection, when viral loads are largest.  
53 Early human herpesvirus infections are hard to sample, so their routes and recombination  
54 opportunities remain obscure. Experimental infections are more accessible. Yet most employ  
55 invasive inoculations, via virus injection or aspiration under anaesthesia [15, 16], which may bypass  
56 (or make) bottle-necks for recombination. The prominent presence of EBV in tonsils during infectious  
57 mononucleosis led to assuming that  $\gamma$ -herpesviruses enter orally [17, 18]. However EBV DNA appears  
58 in blood before saliva [19], arguing that tonsillar infection is host exit, not entry. This result was  
59 anticipated by analysis of the related Murid Herpesvirus-4 (MuHV-4), which found orally fed virions

60 were non-infectious unless they reached the respiratory tract [20], and submucosal B cell  
61 colonisation was subsequent to systemic spread [21]. MuHV-4 enters minimally manipulated mice  
62 via the olfactory epithelium [22]. The only natural non-olfactory uptake known is genital [23].  
63 Olfactory infection spreads to lymph nodes, via dendritic cells [24], then to the spleen and beyond  
64 via B cells [25].

65 While olfactory entry remains unproven for EBV, it is evident for MCMV, including  
66 spontaneous transmission [26], and for HSV-1 [27]. HCMV has an olfactory receptor [28]. MuHV-4,  
67 MCMV and HSV-1 diverged hundreds of millions of years ago [29], so their shared olfactory entry  
68 suggests that many mammalian herpesviruses use the same route. We tested with MuHV-4 whether  
69 it offers an opportunity for co-infecting viruses to recombine.

70

## 71 **Results**

### 72 **Nasal infection with latency-deficient MuHV-4 mutants**

73  $\gamma$ -herpesviruses colonize their hosts lytically and by latency-associated lymphoproliferation.  
 74 MuHV-4 mutants lacking stable latency have been made by over-expressing the ORF50 viral  
 75 transactivator [30, 31], or by disrupting ORF73 episome maintenance [32, 33]. M50 MuHV-4 has an  
 76 MCMV IE1 promoter fragment inserted in the 5' untranslated region of ORF50, deregulating its  
 77 transcription [30]. ORF73FS MuHV-4 has a frameshift mutation in ORF73 [32] (Fig.1a). Both mutants  
 78 replicate lytically in the lungs after a 30 $\mu$ l inoculation under anaesthesia, but poorly colonize  
 79 lymphoid tissue. Nasal inoculation (5 $\mu$ l without anaesthesia) similarly led to local lytic spread but  
 80 significantly less lymph node infection than wildtype, with none detectable in spleens at day 18  
 81 (Fig.1b).

82

### 83 **Recombinational rescue of latency-deficient mutants after nasal co-infection**

84 To test rescue by recombination, we co-infected mice nasally with ORF73FS and M50 MuHV-  
 85 4, then 25 days later determined latency by infectious centre assay (Fig.2). 11/12 co-infected mice  
 86 showed significant splenomegaly (Fig.2a) and splenic infection (Fig.2b). No singly infected mice did  
 87 so - the M50 [30] and ORF73FS mutations [32, 34] have consistently not shown spontaneous  
 88 reversion. Co-infection alone might complement ORF73 deficiency, but ORF50 over-production  
 89 should have a dominant detrimental impact on latency. Therefore recombinational rescue seemed  
 90 more likely. This was confirmed by PCR analysis of viruses cloned from splenic infectious centres.  
 91 Clones from 4/4 co-infected mice showed M50 and ORF73 PCR products of wild-type size (Fig.2c,  
 92 2d), and their DNA sequences exactly matched wild-type.

93 That recombinants showed less early splenomegaly and latency than wild-type was  
 94 unsurprising: even cells co-infected with MuHV-4 *in vitro* yield only a few percent recombinants

95 (PGS, unpublished data), so they would inevitably initiate at low dose. After 3 months, the splenic  
96 loads of co-infected mice were indistinguishable from wild-type, by infectious centre assay (Fig.2e)  
97 and by quantitative PCR of viral DNA (Fig.2f). Thus, while the M50 and ORF73FS viruses vaccinate  
98 against a later wild-type challenge [35, 36], immunity did not impair the outgrowth of recombinant  
99 infection.

100

## 101 **Dual recombinational rescue**

102 Linear genomes can repair single mutations by one recombination. Herpesvirus genome ends  
103 vary more than their middles, and one recombination would allow co-infecting viruses to exchange  
104 left or right end ends. However in more detail, the genome core comprises conserved blocks,  
105 between which lie more varied loci. To exchange these while retaining left and right ends would  
106 require two recombinations. To simulate this setting, we co-infected mice with M50 MuHV-4 and an  
107 ORF73FS mutant that also lacked 10kb from its left end (ORF73FS $\Delta$ L) [37] (Fig.1a). The  $\Delta$ L mutation  
108 deletes ORFs M1-M4, and independently impairs the establishment of a normal latent load [38].  
109 Nasal co-infection nonetheless gave rescue (Fig.3), implying recombination both between ORFs 50  
110 and 73, and between ORF50 and  $\Delta$ L (see Fig.1a). Thus there was no barrier to more complex  
111 categories of recombinational rescue.

112

## 113 **Lung co-infection with latency-deficient MuHV-4 mutants**

114 To determine whether MuHV-4 co-infection generally provides genetic rescue, or whether  
115 this a particular property of olfactory entry, we tested lung inoculation, a widely used immunological  
116 model. We gave mice M50 and ORF73FS MuHV-4 as before but in 30 $\mu$ l under anaesthesia. As alert  
117 mice retain little free fluid in their upper airways [39], lung inoculation is more efficient than nasal.  
118 Therefore we gave 10<sup>4</sup> rather than 10<sup>5</sup> p.f.u. of virus. We assayed spleens for latent load 17 days later  
119 (Fig.4a) - as lung infection is more extensive than olfactory, it drives faster down-stream spread [20].  
120 Low levels of latent infection were seen in the spleens of 3/6 mice.

Comparison with nasal infection (Fig.2b) indicated less efficient rescue via the lungs, both in number of mice with detectable latent infection and in their titers. However direct comparison is difficult between mice infected by different routes. Also, while nasal infection does not reach the lungs, lung inocula must navigate the nose, so the low level splenic latency seen in Fig.4a might have come from contaminating olfactory infection. To address these points we assayed separately the superficial cervical (SCLN) and mediastinal lymph nodes (MLN) of co-infected mice, for latent virus after 12 days (Fig.4b). While lung and olfactory infections both spread via lymph nodes, the SCLN drain the nose whereas the MLN drain the lungs. Mononucleosis-associated systemic viral spread reaches far lymph nodes, but early infections reflect primary replication in peripheral sites. Specifically, low dose day 12 olfactory infections spare the MLN, so infection routes can be distinguished. At this time 4/7 mice had a low level of SCLN latency, and 1/7 mice had MLN latency. Wild-type controls showed significantly more MLN than SCLN infection, matching the more extensive lytic infection of lungs; and the sole positive MLN of the co-infected cohort had a correspondingly higher titer than any SCLN. Thus, we could be confident of not missing recombinational rescue in the lungs. It seemed likely that the low-level day 17 spleen infections in Fig.4a resulted from virus caught inadvertently in the upper respiratory tract, while lung co-inocula rarely recombined: 1/7 mice, versus 11/12 for deliberate olfactory infection in Fig.2b ( $p < 0.002$ ).

138

### 139 **Recombination via olfactory infection but not lungs applies also to MCMV**

To explore whether recombinational rescue was specific to MuHV-4, we tested MCMV, co-infecting BALB/c mice with mutants lacking M33 or M78 (Fig.5). MCMV needs both these G protein-coupled receptor homologues to successfully colonize the salivary glands [39, 40]. Salivary gland plaque assays at 18 days post-lung inoculation were positive only for the wild-type control (Fig.5a). However at day 18 after nasal co-infection, salivary glands were positive for all co-infected mice, and for no M33<sup>-</sup> or M78<sup>-</sup> single controls (Fig.5b).



Viruses cloned from the salivary glands of 4/4 nasally co-infected mice showed a wild-type M33 locus by PCR (Fig.5c). One clone retained a mutant M78 locus (Fig.5d), perhaps because M78-deficient viruses do not always completely lack salivary gland infection [41, 42]. Nonetheless recombination was evidently the main route of rescue. Overall, MCMV like MuHV-4 showed recombinatorial rescue after olfactory infection but not after lung infection.

## Recombination occurs early in olfactory infection

MuHV-4 lung and olfactory infections show similar systemic spread, both being brought by dendritic cells to B cells, while lung and olfactory MCMV infections both spread via dendritic cell recirculation [40, 43]. Thus inefficient recombination via the lungs argued that it occurred early in olfactory infection. Supporting this supposition, infectious centre assays detected more latent MuHV-4 in SCLN at 8 days after nasal M50 / ORF73FS co-infection than after single infections (Fig.6a). The wide spread of co-infection titers at this early timepoint made its yield not significantly more than M50 alone. Therefore we looked further for evidence of recombination by inoculating virus clones from SCLN into the lungs of naive mice (Fig.6b). At day 14, clones recovered from M50 or ORF73FS single inoculations yielded no infectious centres, while all bar one of those from mixed inoculations - presumably a parental M50 virus - had titers indistinguishable from wild-type. Therefore olfactory MuHV-4 recombined before leaving lymph nodes.

We recovered no recombinant viruses from co-infected noses. This likely reflected that without the selective pressure of having to establish latency, the proportion of recombinants remained low; and as M50 MuHV-4 out-replicates the wild-type *in vitro* [29], it predominated when producing stocks from a mixed population. Therefore to position more precisely the place of recombination, we co-infected mice with ORF73FS and ORF50DEL MuHV-4 (Fig.6c). The latter mutant lacks all lytic replication, due to a large deletion in ORF50 (Fig.1a). *In vitro* it must be propagated in complementing ORF50<sup>+</sup> cells [20]; *in vivo* it cannot spread further than the first encountered cells [25]. Nonetheless, spleens and SCLN at 18 days after nasal co-infection yielded

172 recoverable virus for 3/3 mice, and spleens at after 25 days did so for 5/5 mice. Therefore co-  
173 infection must have occurred in the initially infected cells. ORF73FS MuHV-4 could in principle  
174 complement ORF50DEL *in trans*, but an ongoing need for co-infection would render this less efficient  
175 than recombination, and viruses cloned from day 25 spleens of 4/4 co-infected mice showed wild-  
176 type ORF50 and ORF73 loci by PCR (Fig.6d, 6e). DNA sequencing confirmed identity with the wild-  
177 type.

178

# **179 Recombination does not require simultaneous co-infection**

180 ORF50DEL MuHV-4 cannot replicate lytically but can establish a latent infection of olfactory  
181 neurons and sustentacular cells [22]. We reasoned that it might remain accessible to recombination  
182 with a super-infecting virus, and tested this by infecting mice nasally with ORF50DEL MuHV-4, then  
183 5 days later giving the same mice nasal ORF73FS MuHV-4 (Fig.7). We assayed spleens for recoverable  
184 virus another 18 days later. 5/6 co-infected mice showed splenic infection, while no singly infected  
185 controls did so. Therefore latent infection supplied a sufficient substrate for subsequent olfactory  
186 rescue.

187

# **188 A possible site of olfactory recombination.**

189 Olfactory cells far out-number inoculated virions, and initially few are infected [22]. Dilution  
190 should reduce recombination. However the distribution of early olfactory infection is not uniform.  
191 A conspicuously common site is the respiratory / olfactory epithelial border (Fig.8). Anatomical  
192 complexity [44] makes this border hard to check completely, but retrospective review identified its  
193 involvement in 23/30 early infections (1-3 days post-inoculation). Generally noses were examined  
194 only until at 50-100 infected cells were found, so involvement of the border was likely under-  
195 estimated. Frequent infection initiation here would explain the recombinatorial rescue of  
196 replication-deficient virus.

197

## 198 Discussion

199        Herpesviruses interact with polymorphic host genes, and so encounter environmental  
200 change in each infection. Unlinking viral genes can generate new combinations to cope. Host genes  
201 mix in meiosis; viruses must count on co-infecting cells. While herpesviruses show historic  
202 recombination, whether this is occasional and mostly old, or whether viral genes reassort routinely  
203 has been obscure. We showed that for both MCMV and MuHV-4, recombination after olfactory  
204 entry routinely rescues replication defects. It provided repair where point mutations did not, and  
205 was efficient enough to overcome immune priming by the parent viruses.

206        Rescue of replication-deficient MuHV-4 implied co-infection of the first entered cells. The  
207 olfactory cells sit above and behind the respiratory surface, near the cribriform plate, which their  
208 axons broach to reach the brain [44]. Thus inhaled droplets reach the respiratory epithelium first,  
209 and surface tension likely captures them onto mucus. Consistent with this concept, inhaled virions  
210 appear immediately on the respiratory epithelium then disappear from here, while on the olfactory  
211 epithelium they accumulate and infect [22]. Respiratory epithelial cells are not infected because they  
212 lack apical heparan. Instead their cilia beating bears mucus-bound virions backwards. Hence  
213 infection commonly occurred close to the respiratory / olfactory border. Such concentration of  
214 captured virions should promote co-infection. It is probably more pronounced still in natural  
215 transmission, as negligible volume would then minimize nasal fluid flow. Cilia clearance of captured  
216 virions would explain further why olfactory infections fail to involve the lungs [20, 26, 27], as  
217 bronchial cilia push their mucus upwards to be swallowed.

218        MuHV-4 binds to olfactory neuronal cilia. Yet in adult mice it infects mostly adjacent  
219 sustentacular cells, which accumulate virions on their apical microvilli [22]. The neuronal cilia are  
220 too fine to transport virions internally, so retrograde cilia transport may move bound virions  
221 externally across the olfactory mucus. Sustentacular microvilli could then collect them. Mutant

222 rescue via the lungs was rare, despite more lytic replication happening here. MuHV-4 lung entry  
223 involves macrophages capturing virions from alveolar epithelial cells [45], reminiscent of  
224 sustentacular cells capturing them from olfactory cilia. However inoculated virions are diluted  
225 among many more alveoli [45, 46]. Thus there may be little co-capture, and whether infection can  
226 spread between alveoli is far from clear.

227        Limited rescue via the lungs argued against frequent recombination down-stream of the  
228 olfactory epithelium, as subsequent spread seems similar between these routes - via dendritic cells  
229 to B cells. Once a tissue barrier is breached immunity begins, so infection must spread fast, implying  
230 selection for divergence over convergence. Down-stream dilution would explain how recombinants  
231 escaped the dominant negative impact of M50 on latency. While the latency defects of M50 and  
232 ORF73FS MuHV-4 made recombination in spleens impossible to assay, spread here recapitulates the  
233 myeloid / lymphoid virus relay into SCLN [24], via reactivation from B cells [47] then virion capture  
234 and transfer by marginal zone macrophages [25]. Thus it provides no obvious point of convergence.  
235 Ultimately, many reactivations pool progeny virions in saliva, but recombination requires that these  
236 virions co-infect. The obvious site for this is in new hosts.

237        EBV carriers can co-shed virus strains acutely [48], but long term infections seem to select  
238 single dominant strains [49]. So if co-infection depended completely on carriers co-shedding - if it  
239 takes a co-infection to make a co-infection - how could it remain common? There must also  
240 be a means to mix serially infecting viruses. MuHV-4 vaccine assays argue that anti-viral immunity  
241 inhibits super-infection [46], even if the immunizing virus persists poorly [35, 36]. However  
242 establishing effective immunity takes time. The antibody response to MuHV-4 does not reach its  
243 peak for at least 3 months [50]; EBNA-specific antibodies appear many months after EBV acquisition,  
244 indicating immunity is still maturing; and EBV loads remain elevated for at least as long [51]. Thus  
245 an infant infected by a single maternal strain could acquire more from other carers [52] while still  
246 susceptible to super-infection.

247 Primary olfactory infection is soon suppressed [20, 26, 27]. Yet the proximity of mouth and  
 248 nose means infected hosts inevitably inhale some of their own shed salivary virus. So carriers may  
 249 continue to display their resident viruses for recombination. Latency in olfactory epithelial cells  
 250 provides another means to meet. Olfactory entry by herpesviruses depends on heparan binding [22].  
 251 As such binding is widely shared, other viruses might also meet at the respiratory / olfactory border.  
 252 The inherent dilution of transmission presents a problem for adeno-associated virus, to find an  
 253 assisting adenovirus in each new host; but as both bind heparan [53, 54], adeno-associated virus  
 254 could use latency in the olfactory epithelium to ambush its essential aide.

255

## 256 **Materials and Methods**

257 **Mice** C57BL/6 or BALB/c mice were infected intranasally (i.n.) when 6–14 weeks old, either in 30µl  
258 under isoflurane anaesthesia to reach the lungs ( $10^4$  p.f.u.), or in 5µl without anaesthesia ( $10^5$  p.f.u.),  
259 to infect only the upper respiratory tract. A higher dose was used for upper respiratory tract  
260 infection, as most of the inoculum is swallowed [39]. Statistical comparison was by Student's 2-tailed  
261 unpaired *t*-test unless stated otherwise.

262

263 **Ethics statement** Experiments were approved by the University of Queensland Animal Ethics  
264 Committee in accordance with the Australian code for the care and use of animals for scientific  
265 purposes, from the Australian National Health and Medical Research Council (projects 391/15,  
266 479/15, 196/18, 207/18).

267

268 **Cells and Viruses** BHK-21 fibroblasts (American Type Culture Collection (ATCC) CCL-10), NIH-3T3  
269 cells (ATCC CRL-1658) and NIH-3T3-ORF50 cells [20] were grown in Dulbecco's modified Eagle's  
270 medium (Gibco) with 2mM glutamine, 100IU/ml penicillin, 100µg/ml streptomycin and 10% fetal  
271 calf serum (complete medium). Murine embryonic fibroblasts were grown in similarly supplemented  
272 minimal essential medium. MuHV-4 with a frameshift inactivating ORF73 [32], with an additional  
273 deletion of 10kb from the genome left end, that includes ORFs M1, M2, M3, M4 and 4 [37], with a  
274 deletion of ORF50 exon 2 [20], or with an MCMV IE1 promoter fragment inserted in the 5'  
275 untranslated region of ORF50 [30] are described. ORF50DEL MuHV-4 was grown and titered in NIH-  
276 3T3-ORF50 cells. Other MuHV-4 derivatives were grown and titered in BHK-21 cells. MCMV mutants  
277 with a β-galactosidase expression cassette disrupting M33 [40] or M78 [41] were derived from K181  
278 strain Perth, which was used as the wild-type. All were grown in NIH-3T3 cells. Infected cell

279 supernatants were cleared of debris by low speed centrifugation (200 x *g*, 5 min). Cell-free virions  
280 were then concentrated by ultracentrifugation (35,000 x *g*, 1.5h) and stored at -80°C.

281

282 **Infectivity assays** Infectious virus was quantified by plaque assay. For MuHV-4 [55], virus  
283 stocks or freeze-thawed tissue homogenates dilutions were incubated with BHK-21 cells (2h, 37°C),  
284 overlaid with complete medium / 0.3% carboxymethylcellulose, cultured for 4 days, fixed with 1%  
285 formaldehyde and stained with 0.1% toluidine blue for plaque counting. MCMV was titered similarly  
286 but on murine embryonic fibroblast monolayers [41], and was adhered by centrifugation (500 x *g*,  
287 30 min) before discarding the inoculum. Total recoverable MuHV-4 (latent plus pre-formed infectious  
288 virus) was quantified by infectious centre (i.c.) assay [55]. Freshly isolated lymph node or spleen cells  
289 were layered onto BHK-21 cell monolayers then cultured and processed as for plaque assays. For  
290 parallel assays of pre-formed infectious virus, samples were first frozen and thawed.

291

292 **Viral Genome Quantitation** MuHV-4 genomic coordinates 4163-4308 (M2 ORF; primers  
293 4163-4183 and 4288-4308) were amplified by PCR (Rotor Gene 3000, Corbett Research) from 50ng  
294 DNA (Nucleospin Tissue kit, Macherey-Nagel). PCR products quantified with Sybr green (Thermo  
295 Fisher Scientific) were compared to a standard curve of cloned template amplified in parallel, and  
296 distinguished from paired primers by melting-curve analysis. Correct sizing was confirmed by  
297 electrophoresis and ethidium bromide staining. Cellular DNA in the same samples was quantified by  
298 parallel amplification of a  $\beta$ -actin gene fragment.

299

300 **Virus genotyping** M50 MuHV-4 has the proximal 416bp of the murine cytomegalovirus  
301 IE1/IE3 promoter inserted at genomic coordinate 66718, between the ORF50 transcription (66642)  
302 and translation start sites (66760). To detect this insert we amplified across genomic coordinates  
303 66580-66848, using primers 5'-cacattatcccacaatgtgctgc and 5'-gaaatactgatctgtctgcgtgg. This gave a  
304 268bp wild-type product and a 684bp M50 product. ORF50DEL MuHV-4 has genomic coordinates

67792-69177 deleted from ORF50 exon 2 (67661-69376). In place is ligated a 1961bp fragment comprising the firefly luciferase coding sequence in frame with ORF50 (1672bp) and an SV40 polyadenylation signal (289bp). We amplified across genomic coordinates 67672-69240, using primers 5'- gatcgaagcaggtctacttgag and 5'- tcagcagtgctctggttgcc, to give a 1569bp wild-type band or a 2145bp mutant band. ORF73FS MuHV-4 has a 5bp insert at genomic coordinate 104379 in ORF73 (104869-103925). This disrupts a *Bst*Ell restriction site. We amplified across genomic coordinates 104152-104580, using primers 5'-ttcacagtaggccaagacaacc and 5'-ccaccatcaccagatgttgatg. This gave a 428bp wild-type product, cut by *Bst*Ell into 228bp and 200bp fragments; or a 433bp mutant product not cut by *Bst*Ell. DNA sequencing of PCR products was performed at the Australian Genome Research Facility (St.Lucia, Queensland). To identify MCMV M33 disruption we amplified viral DNA with primers 5'- gtggtgctgacgacgcagctgctg and 5'- gtgtggctgcgctgcggtacgag for a wild type band of 572bp. The M33<sup>-</sup> mutant has a 3.8kb HCMV IE1 promoter - lacZ - poly A cassette inserted without deletion to give a 4.4kb band. To identify M78 disruption we amplified viral DNA with primers 5'- tcgtctgccctctaaggta and 5'- cagacggtggggatcttgtcg for a wild type band of 919bp. The M78<sup>-</sup> mutant has an equivalent 3.8kb cassette insertion to give a 4.7kb band.

320

**Immunostaining tissue sections**                      Organs were fixed in 1% formaldehyde / 10 mM sodium periodate / 75 mM L-lysine (18h, 4°C). Noses were then decalcified in 150mM NaCl / 50mM TrisCl pH 7.2 / 270mM EDTA for two weeks at 23°C, changing the solution every 3 days, then washed twice in PBS. Samples were dehydrated in graded ethanol solutions, embedded in paraffin, and cut with a microtome. Sections were then de-waxed in xylene, rehydrated, washed 3x in PBS and air-dried. Endogenous peroxidase activity was quenched in PBS / 3% H<sub>2</sub>O<sub>2</sub> for 10min. Sections were blocked (1h, 23°C) with 0.3% Triton X-100 / 5% normal donkey serum, and incubated (18h, 4°C) with anti-MuHV-4 rabbit pAb, which recognizes a range of virion proteins by immunoblot, including the products of ORF4 (gp70), M7 (gp150), and ORF65 (p20) [55]. Sections were additionally blocked with Avidin/Biotin Blocking Kit (Vector Laboratories). Detection was with biotinylated goat anti-rabbit IgG



331 pAb (1h, 23°C, Vector Laboratories), Vectastain Elite ABC Peroxidase system, and ImmPACT  
332 diaminobenzidine substrate (Vector Laboratories). Stained sections were counterstained with  
333 Mayer's Hemalum (Merck), dehydrated and mounted in DPX (BDH).

334

335 **Financial disclosure statement**

336 The work was supported by grants from the National Health and Medical Research Council (project  
337 grants 1122070, 1140169), the Australian Research Council (grant DP190101851), and Queensland  
338 Health.

339

340

## 341 **References**

- 342 1. Szpara ML, Gatherer D, Ochoa A, Greenbaum B, Dolan A, Bowden RJ, et al. Evolution and  
343 diversity in human herpes simplex virus genomes. *J Virol.* 2014;88: 1209-1227.
- 344 2. Suárez NM, Wilkie GS, Hage E, Camiolo S, Holton M, Hughes J, et al. Human Cytomegalovirus  
345 Genomes Sequenced Directly From Clinical Material: Variation, Multiple-Strain Infection,  
346 Recombination, and Gene Loss. *J Infect Dis.* 2019;220: 781-791.
- 347 3. Palser AL, Grayson NE, White RE, Corton C, Correia S, Ba Abdullah MM, et al. Genome  
348 diversity of Epstein-Barr virus from multiple tumor types and normal infection. *J Virol.* 2015;89:  
349 5222-5237.
- 350 4. Abbotts J, Nishiyama Y, Yoshida S, Loeb LA. On the fidelity of DNA replication: herpes  
351 DNA polymerase and its associated exonuclease. *Nucleic Acids Res.* 1987;15: 1185-1198.
- 352 5. Pyzik M, Dumaine A, Charbonneau B, Fodil-Cornu N, Jonjic S, Vidal SM. Viral MHC class I-like  
353 molecule allows evasion of NK cell effector responses in vivo. *J Immunol.* 2014;193: 6061-6069.
- 354 6. Smith HR, Heusel JW, Mehta IK, Kim S, Dorner BG, Naidenko OV, et al. Recognition of a virus-  
355 encoded ligand by a natural killer cell activation receptor. *Proc Natl Acad Sci USA.* 2002;99: 8826-  
356 8831.
- 357 7. Corbett AJ, Coudert JD, Forbes CA, Scalzo AA. Functional consequences of natural sequence  
358 variation of murine cytomegalovirus m157 for Ly49 receptor specificity and NK cell activation. *J*  
359 *Immunol.* 2011;186: 1713-1722.
- 360 8. Pfaff F, Groth M, Sauerbrei A, Zell R. Genotyping of herpes simplex virus type 1 by whole-  
361 genome sequencing. *J Gen Virol.* 2016;97: 2732-2741.
- 362 9. Cudini J, Roy S, Houldcroft CJ, Bryant JM, Depledge DP, Tutill H, et al.  
363 Human cytomegalovirus haplotype reconstruction reveals high diversity due to superinfection and  
364 evidence of within-host recombination. *Proc Natl Acad Sci USA.* 2019;116: 5693-5698.

- 365 10. McGeoch DJ, Gatherer D. Lineage structures in the genome sequences of three Epstein-  
366 Barr virus strains. *Virology*. 2007;359: 1-5.
- 367 11. Kakoola DN, Sheldon J, Byabazaire N, Bowden RJ, Katongole-Mbidde E, Schulz TF, et al.  
368 Recombination in human herpesvirus-8 strains from Uganda and evolution of the K15 gene. *J Gen*  
369 *Virol*. 2001;82: 2393-2404.
- 370 12. Hage E, Wilkie GS, Linnenweber-Held S, Dhingra A, Suárez NM, Schmidt JJ, et al.  
371 Characterization of Human Cytomegalovirus Genome Diversity in Immunocompromised Hosts by  
372 Whole-Genome Sequencing Directly From Clinical Specimens. *J Infect Dis*. 2017;215: 1673-1683.
- 373 13. Sitki-Green D, Covington M, Raab-Traub N. Compartmentalization and transmission of  
374 multiple Epstein-Barr virus strains in asymptomatic carriers. *J Virol*. 2003;77: 1840-1847.
- 375 14. Hoagland RJ. The incubation period of infectious mononucleosis. *Am J Public Health Nations*  
376 *Health*. 1964;54: 1699-1705.
- 377 15. Gillet L, Frederico B, Stevenson PG. Host entry by  $\gamma$ -herpesviruses-lessons from animal  
378 viruses? *Curr Opin Virol*. 2015;15: 34-40.
- 379 16. Farrell HE, Stevenson PG. Cytomegalovirus host entry and spread. *J Gen Virol*. 2019 ;100:  
380 545-553.
- 381 17. Hoagland RJ. The transmission of infectious mononucleosis. *Am J Med Sci*. 1955;229: 262-  
382 272.
- 383 18. Rickinson AB, Yao QY, Wallace LE. Epstein-Barr virus as a model of virus-host interactions. *Br*  
384 *Med Bull*. 1985;41: 75-79.
- 385 19. Dunmire SK, Grimm JM, Schmeling DO, Balfour HH, Hogquist KA. The Incubation Period of  
386 Primary Epstein-Barr Virus Infection: Viral Dynamics and Immunologic Events. *PLoS Pathog*. 2015;11:  
387 e1005286.
- 388 20. Milho R, Smith CM, Marques S, Alenquer M, May JS, Gillet L, et al. In vivo imaging of murid  
389 herpesvirus-4 infection. *J Gen Virol*. 2009;90: 21-32.

- 390 21. Frederico B, Milho R, May JS, Gillet L, Stevenson PG. Myeloid infection links epithelial and B  
391 cell tropisms of Murid Herpesvirus-4. PLoS Pathog. 2012;8: e1002935.
- 392 22. Milho R, Frederico B, Efstathiou S, Stevenson PG. A heparan-dependent herpesvirus targets  
393 the olfactory neuroepithelium for host entry. PLoS Pathog. 2012;8: e1002986.
- 394 23. François S, Vidick S, Sarlet M, Desmecht D, Drion P, Stevenson PG, et al. Illumination of  
395 murine gammaherpesvirus-68 cycle reveals a sexual transmission route from females to males in  
396 laboratory mice. PLoS Pathog. 2013;9: e1003292.
- 397 24. Gaspar M, May JS, Sukla S, Frederico B, Gill MB, Smith CM, et al. Murid herpesvirus-4 exploits  
398 dendritic cells to infect B cells. PLoS Pathog. 2011;7: e1002346.
- 399 25. Frederico B, Chao B, May JS, Belz GT, Stevenson PG. A murid  $\gamma$ -herpesviruses exploits normal  
400 splenic immune communication routes for systemic spread. Cell Host Microbe. 2014;15: 457-470.
- 401 26. Farrell HE, Lawler C, Tan CS, MacDonald K, Bruce K, Mach M, et al. Murine Cytomegalovirus  
402 Exploits Olfaction To Enter New Hosts. mBio. 2016;7: e00251-16.
- 403 27. Shivkumar M, Milho R, May JS, Nicoll MP, Efstathiou S, Stevenson PG. Herpes simplex virus 1  
404 targets the murine olfactory neuroepithelium for host entry. J Virol. 2013;87: 10477-10488.
- 405 28. E X, Meraner P, Lu P, Perreira JM, Aker AM, McDougall WM, et al. OR14I1 is a receptor for  
406 the human cytomegalovirus pentameric complex and defines viral epithelial cell tropism. Proc Natl  
407 Acad Sci USA. 2019;116: 7043-7052.
- 408 29. McGeoch DJ, Rixon FJ, Davison AJ. Topics in herpesvirus genomics and evolution. Virus Res.  
409 2006;117: 90-104.
- 410 30. May JS, Coleman HM, Smillie B, Efstathiou S, Stevenson PG. Forced lytic replication impairs  
411 host colonization by a latency-deficient mutant of murine gammaherpesvirus-68. J Gen Virol.  
412 2004;85: 137-146.
- 413 31. Rickabaugh TM, Brown HJ, Martinez-Guzman D, Wu TT, Tong L, Yu F, et al. Generation of  
414 a latency-deficient gammaherpesvirus that is protective against secondary infection. J Virol.  
415 2004;78: 9215-9223.

- 416 32. Fowler P, Marques S, Simas JP, Efstathiou S. ORF73 of murine herpesvirus-68 is critical for the  
417 establishment and maintenance of latency. *J Gen Virol.* 2003;84: 3405-3416.
- 418 33. Moorman NJ, Willer DO, Speck SH. The gammaherpesvirus 68 latency-associated nuclear  
419 antigen homolog is critical for the establishment of splenic latency. *J Virol.* 2003;77: 10295-10303.
- 420 34. Lawler C, Stevenson PG. Limited protection against  $\gamma$ -herpesvirus infection by replication-  
421 deficient virus particles. *J Gen Virol.* 2020;101: 420-425.
- 422 35. Boname JM, Coleman HM, May JS, Stevenson PG. Protection against wild-type murine  
423 gammaherpesvirus-68 latency by a latency-deficient mutant. *J Gen Virol.* 2004;85: 131-135.
- 424 36. Fowler P, Efstathiou S. Vaccine potential of a murine gammaherpesvirus-68 mutant deficient  
425 for ORF73. *J Gen Virol.* 2004;85: 609-613.
- 426 37. Lawler C, Simas JP, Stevenson PG. Vaccine protection against murine herpesvirus-4 is  
427 maintained when the priming virus lacks known latency genes. *Immunol Cell Biol.* 2020; 98:67-78.
- 428 38. Clambey ET, Virgin HW, Speck SH. Characterization of a spontaneous 9.5-kilobase-deletion  
429 mutant of murine gammaherpesvirus 68 reveals tissue-specific genetic requirements for latency. *J*  
430 *Virol.* 2002;76: 6532-6544.
- 431 39. Tan CS, Frederico B, Stevenson PG. Herpesvirus delivery to the murine respiratory tract. *J*  
432 *Virol Methods.* 2014;206: 105-114.
- 433 40. Farrell HE, Bruce K, Lawler C, Oliveira M, Cardin R, Davis-Poynter N, et al. Murine  
434 Cytomegalovirus Spreads by Dendritic Cell Recirculation. *mBio.* 2017;8: e01264-17.
- 435 41. Yunis J, Farrell HE, Bruce K, Lawler C, Sidenius S, Wyer O, et al. Murine cytomegalovirus  
436 degrades MHC class II to colonize the salivary glands. *PLoS Pathog.* 2018;14: e1006905.
- 437 42. Davis-Poynter N, Yunis J, Farrell HE. The Cytoplasmic C-Tail of the Mouse Cytomegalovirus 7  
438 Transmembrane Receptor Homologue, M78, Regulates Endocytosis of the Receptor and Modulates  
439 Virus Replication in Different Cell Types. *PLoS One.* 2016;11: e0165066.
- 440 43. Farrell HE, Bruce K, Lawler C, Stevenson PG. Murine Cytomegalovirus Spread Depends on the  
441 Infected Myeloid Cell Type. *J Virol.* 2019;93: e00540-19.

442 44. Barrios AW, Núñez G, Sánchez Quinteiro P, Salazar I. Anatomy, histochemistry, and  
443 immunohistochemistry of the olfactory subsystems in mice. *Front Neuroanat.* 2014;8: 63.

444 45. Lawler C, Milho R, May JS, Stevenson PG. Rhadinovirus host entry by co-operative infection.  
445 *PLoS Pathog.* 2015;11: e1004761.

446 46. Glauser DL, Milho R, Lawler C, Stevenson PG. Antibody arrests  $\gamma$ -herpesvirus olfactory super-  
447 infection independently of neutralization. *J Gen Virol.* 2019;100: 246-258.

448 47. Lawler C, de Miranda MP, May J, Wyer O, Simas JP, Stevenson PG. Gamma-herpesvirus  
449 Colonization of the Spleen Requires Lytic Replication in B Cells. *J Virol.* 2018;92: e02199-17.

450 48. Sitki-Green DL, Edwards RH, Covington MM, Raab-Traub N. Biology of Epstein-Barr virus  
451 during infectious mononucleosis. *J Infect Dis.* 2004;189: 483-492.

452 49. Weiss ER, Lamers SL, Henderson JL, Melnikov A, Somasundaran M, Garber M, et al.  
453 Early Epstein-Barr Virus Genomic Diversity and Convergence toward the B95.8 Genome in Primary  
454 Infection. *J Virol.* 2018;92: e01466-17.

455 50. Stevenson PG, Doherty PC. Kinetic analysis of the specific host response to a murine  
456 gammaherpesvirus. *J Virol.* 1998;72: 943-949.

457 51. Johnson KH, Webb CH, Schmeling DO, Brundage RC, Balfour HH. Epstein-Barr virus dynamics  
458 in asymptomatic immunocompetent adults: an intensive 6-month study. *Clin Transl Immunology.*  
459 2016;5: e81.

460 52. Lang DJ, Garruto RM, Gajdusek DC. Early acquisition of cytomegalovirus and Epstein-Barr  
461 virus antibody in several isolated Melanesian populations. *Am J Epidemiol.* 1977;105: 480-487.

462 53. Dechecchi MC, Tamanini A, Bonizzato A, Cabrini G. Heparan sulfate glycosaminoglycans are  
463 involved in adenovirus type 5 and 2-host cell interactions. *Virology.* 2000;268: 382-390.

464 54. Summerford C, Samulski RJ. Membrane-associated heparan sulfate proteoglycan is a  
465 receptor for adeno-associated virus type 2 virions. *J Virol.* 1998;72: 1438-1445.

466 55. de Lima BD, May JS, Stevenson PG. Murine gammaherpesvirus 68 lacking gp150 shows  
467 defective virion release but establishes normal latency in vivo. *J Virol.* 2004;78: 5103-112.

468

## 469 **Figure Legends**

### 470 **Figure 1. Nasal infection by MuHV-4 mutants lacking normal latency.**

471 **a.** A schematic sketch of MuHV-4 mutations shows the linear genome flanked by terminal repeats  
472 (TR), with expanded views below. Replication-deficient ORF50DEL MuHV-4 has most of ORF50 exon  
473 2 replaced by luciferase plus a polyadenylation site. ORF73FS MuHV-4 has a frameshift in ORF73,  
474 which encodes the viral episome maintenance protein. The  $\Delta$ L virus mutation additionally deletes  
475 11kb from the genome left end, removing ORFs M1-M4. M50 MuHV-4 has an MCMV IE1 promoter  
476 inserted in the 5' untranslated region of ORF50. p1-p6 show the locations of primers used to identify  
477 the ORF50DEL, M50 and ORF73FS mutations.

478 **b.** C57BL/6 mice were infected nasally ( $10^5$  p.f.u. in 5 $\mu$ l without anaesthesia) with wild-type, M50 or  
479 ORF73FS virus. Noses were titrated by plaque assay. Superficial cervical lymph nodes (SCLN) and  
480 spleens were titrated by infectious centre assay. Symbols show individual mice, bars show means.  
481 The dashed line shows the detection limit. Significant differences in virus recovery relative to wild-  
482 type are shown.

483

### 484 **Figure 2. Recovery of latency after nasal co-infection with latency-deficient MuHV-4 mutants.**

485 **a.** C57BL/6 mice were infected nasally ( $10^5$  p.f.u.) with wild-type, M50 or ORF73FS virus, or a 1:1  
486 M50 / ORF73FS mix. Weights of spleens 25 days later are shown, compared to naive mice, with  
487 significant splenomegaly for the wild-type and mixed infections. Symbols show individual mice, bars  
488 show means.

489 **b.** The spleens in **a** were titrated for latent virus by infectious centre assay. Symbols show individuals,  
490 bars show means. The dashed line shows the lower limit of assay detection. Mixed M50 / ORF73FS  
491 infection yielded significantly more virus than either single infection. No preformed infectious virus  
492 was recovered by parallel titer of freeze-thawed spleen samples.



493 **c.** Viruses cloned (c1-c4) from spleens of mixed infection mice were genotyped by PCR across the  
494 M50 insertion site (primers p1 and p2 in Fig.1a). PCR products were resolved by agarose gel  
495 electrophoresis and stained with ethidium-bromide. WT and M50 are wild-type and M50 input  
496 viruses. Mw = molecular weight markers. Sequencing of the main (268bp) product of cloned virus  
497 DNA confirmed identity with the wild-type.

498 **d.** DNA from the cloned viruses in **c** was genotyped by PCR across the ORF73 frameshift (primers p5  
499 and p6 in Fig.1a). PCR products were digested or not with *Bst*EII, resolved by agarose gel  
500 electrophoresis, and stained with ethidium-bromide. WT and 73 are wild-type and ORF73FS input  
501 viruses. As the viruses were cloned prior to analysis, we interpret the minor residual 0.43kb product  
502 for *Bst*EII-digested c3 DNA as incomplete digestion. DNA sequencing of the main (428bp) undigested  
503 product of the cloned viruses confirmed identity with the wild-type.

504 **e.** C57BL/6 mice were infected as in **a**. 3 months later, latent virus was detected by infectious centre  
505 assay. M50 / ORF73FS co-infection yielded significantly more virus than either single infection, and  
506 was indistinguishable from wild-type. Symbols show individual mice, bars show means. The dashed  
507 line shows the detection limit.

508 **f.** The spleens in **e** were assayed for viral genomes by quantitative PCR of extracted DNA. Viral copies  
509 are expressed relative to cellular  $\beta$ -actin copies amplified in parallel. M50 / ORF73FS co-infection  
510 yielded significantly more viral genomes than either single infection, and was indistinguishable from  
511 wild-type.

512

### 513 **Figure 3. Recovery of latency after co-infection by M50 and ORF73FS $\Delta$ L mutants.**

514 C57BL/6 mice were infected nasally ( $10^5$  p.f.u.) with wild-type, M50 or ORF73FS $\Delta$ L virus, or a 1:1  
515 M50 / ORF73FS $\Delta$ L mix. We also infected mice with a control  $\Delta$ L single mutant. Spleens were  
516 infectious centre-assayed for latent infection 25 days later. Symbols show individual mice, bars show  
517 means. The dashed line shows the detection limit. M50 / ORF73FS $\Delta$ L co-infection yielded

518 significantly more latency than either virus alone. No preformed infectious virus was recovered by  
519 parallel titer of freeze-thawed spleen samples.

520

521 **Figure 4. Little evidence of MuHV-4 recombination after lung co-infection.**

522 **a.** C57BL/6 mice were infected in the lungs ( $10^4$  p.f.u. in 30 $\mu$ l under anaesthesia) with wild-type, M50  
523 or ORF73FS viruses, or a 1:1 M50 / ORF73FS mix. Spleens were infectious centre assayed for latent  
524 virus 17 days later. Symbols show individual mice, bars show means. The dashed line is the detection  
525 limit.

526 **b.** Mice were infected as in **a**. 12 days later, SCLN and MLN were infectious centre-assayed for latent  
527 virus.

528

529 **Figure 5. Rescue of MCMV mutants after co-infection in the nose but not the lungs.**

530 **a.** BALB/c mice were infected in the lungs ( $10^4$  p.f.u.) with wild-type, M33<sup>-</sup> or M78<sup>-</sup> MCMV, or a 1:1  
531 M33<sup>-</sup> / M78<sup>-</sup> mix. 18 days later, salivary glands were plaque-assayed for infectious virus. Symbols  
532 show individual mice, bars show means. The dashed line is the detection limit. Only wild-type  
533 infection yielded recoverable virus.

534 **b.** BALB/c mice were infected nasally ( $10^5$  p.f.u.) with M33<sup>-</sup> or M78<sup>-</sup> MCMV, or a 1:1 M33<sup>-</sup> / M78<sup>-</sup> mix.  
535 18 days later, salivary glands were plaque-assayed for infectious virus. Symbols show individual mice,  
536 bars show means. Only the mixed infection yielded recoverable virus.

537 **c.** DNA of virus cloned from mixed infection salivary glands in **b** was checked for M33 mutation by  
538 PCR. 33 and 78 are the M33<sup>-</sup> and M78<sup>-</sup> input viruses. The predicted wild-type band is 572bp. The  
539 upper 33 sample band corresponds to the expected size for the lacZ cassette insertion of the mutant  
540 (4.4kb). The source of the lower (2.2kb) 33 sample band is unclear, but the 33 sample is clearly free  
541 of wild-type DNA, and no recovered clone shows a mutant M33 locus.

542 **d.** The same DNA samples were checked for M78 mutation. Clone 2 appeared to be a parental M78<sup>-</sup>  
543 virus. The other 3 clones had a wild-type M78 locus, indicating recombination.

544

545 **Figure 6. Early recombinational rescue of MuHV-4 after nasal co-infection.**

546 **a.** C57BL/6 mice were infected nasally ( $10^5$  p.f.u.) with wild-type, M50 or ORF73FS MuHV-4, or a 1:1  
547 M50 / ORF73FS mix. 8 days later, latent virus in SCLN was infectious centre-assayed. Symbols show  
548 individual mice, bars show means. The dashed line is the detection limit. Mixed infections gave  
549 higher titers than either component single infection, although the wide spread meant that as a group  
550 they were not significantly higher than M50 alone.

551 **b.** Viruses cloned from SCLN for each mouse in **a** were given i.n. to naive mice under anaesthesia to  
552 inoculate the lungs ( $10^3$  p.f.u. in 30 $\mu$ l). One clone from each positive mouse was given to one naive  
553 mouse. 14 days later spleens were infectious centre-assayed for latent infection. Symbols show  
554 individual mice, bars show means.

555 **c.** C57BL/6 mice were infected nasally ( $10^5$  p.f.u. in 5 $\mu$ l) with wild-type, ORF50DEL or ORF73FS MuHV-  
556 4, or a 1:1 ORF50DEL / ORF73FS mix. 18 days later, SCLN and spleens was infectious centre-assayed  
557 for latent virus. Symbols show individual mice, bars show means. Mixed infections gave significantly  
558 higher titers than either component single infection.

559 **d.** Mice infected as in **c** were infectious centre-assayed for splenic virus after 25 days. Mixed  
560 infections gave significantly higher titers than either component single infection.

561 **e.** DNA of viruses cloned (c1-c4) from mixed infection spleens in **d** was PCR amplified across the  
562 ORF50 deletion site (primers p3 and p4 in Fig.1a). The PCR products were resolved by agarose gel  
563 electrophoresis and stained with ethidium-bromide. WT and 50 show wild-type and ORF50DEL input  
564 viruses. Mw = molecular weight markers. DNA sequencing of cloned virus PCR products confirmed  
565 identity with the wild-type.

566 **f.** DNA from the mixed infection clones in **e** was PCR amplified across the ORF73 frameshift site  
567 (primers p5 and p6 in Fig.1a). The PCR products were digested or not with *Bst*EII, resolved by agarose  
568 gel electrophoresis, and stained with ethidium-bromide. WT and 73 are the wild-type and ORF73FS  
569 input viruses. As in Fig.2d, as c1-c4 were cloned prior to analysis, the minor residual 0.43kb band

570 after incubation with *Bst*EI digestion presumably reflected incomplete digestion rather than mutant  
571 DNA. Sequencing of the undigested PCR products confirmed identity with the wild-type.

572

# 573 **Figure 7. Recombinational rescue after serial mixed infection.**

574 **a.** C57BL/6 mice were infected nasally ( $10^5$  p.f.u.) with ORF50DEL MuHV-4. 5 days later they were  
575 infected nasally ( $10^5$  p.f.u.) with ORF73FS MuHV-4. Controls were given either just ORF50DEL or just  
576 ORF73FS. 18 days after ORF73FS infection, spleens were infectious centre-assayed for latent virus.  
577 Symbols show individual mice, bars show means. The dashed line shows the detection limit. Serial  
578 mixed infection yielded significantly more recoverable virus than either single infection.

579

# 580 **Figure 8. Infection at the olfactory / respiratory border.**

581 C57BL/6 mice were infected nasally with wild-type MuHV-4 ( $10^5$  p.f.u.). 1-3 days later, nose sections  
582 were stained for viral lytic antigens with a polyclonal rabbit serum (brown), and counter-stained with  
583 haemalum (blue). OE = olfactory epithelium, RE = respiratory epithelium. Representative sections  
584 show foci of infection on the olfactory side of the olfactory / respiratory border.

585

Figure 1

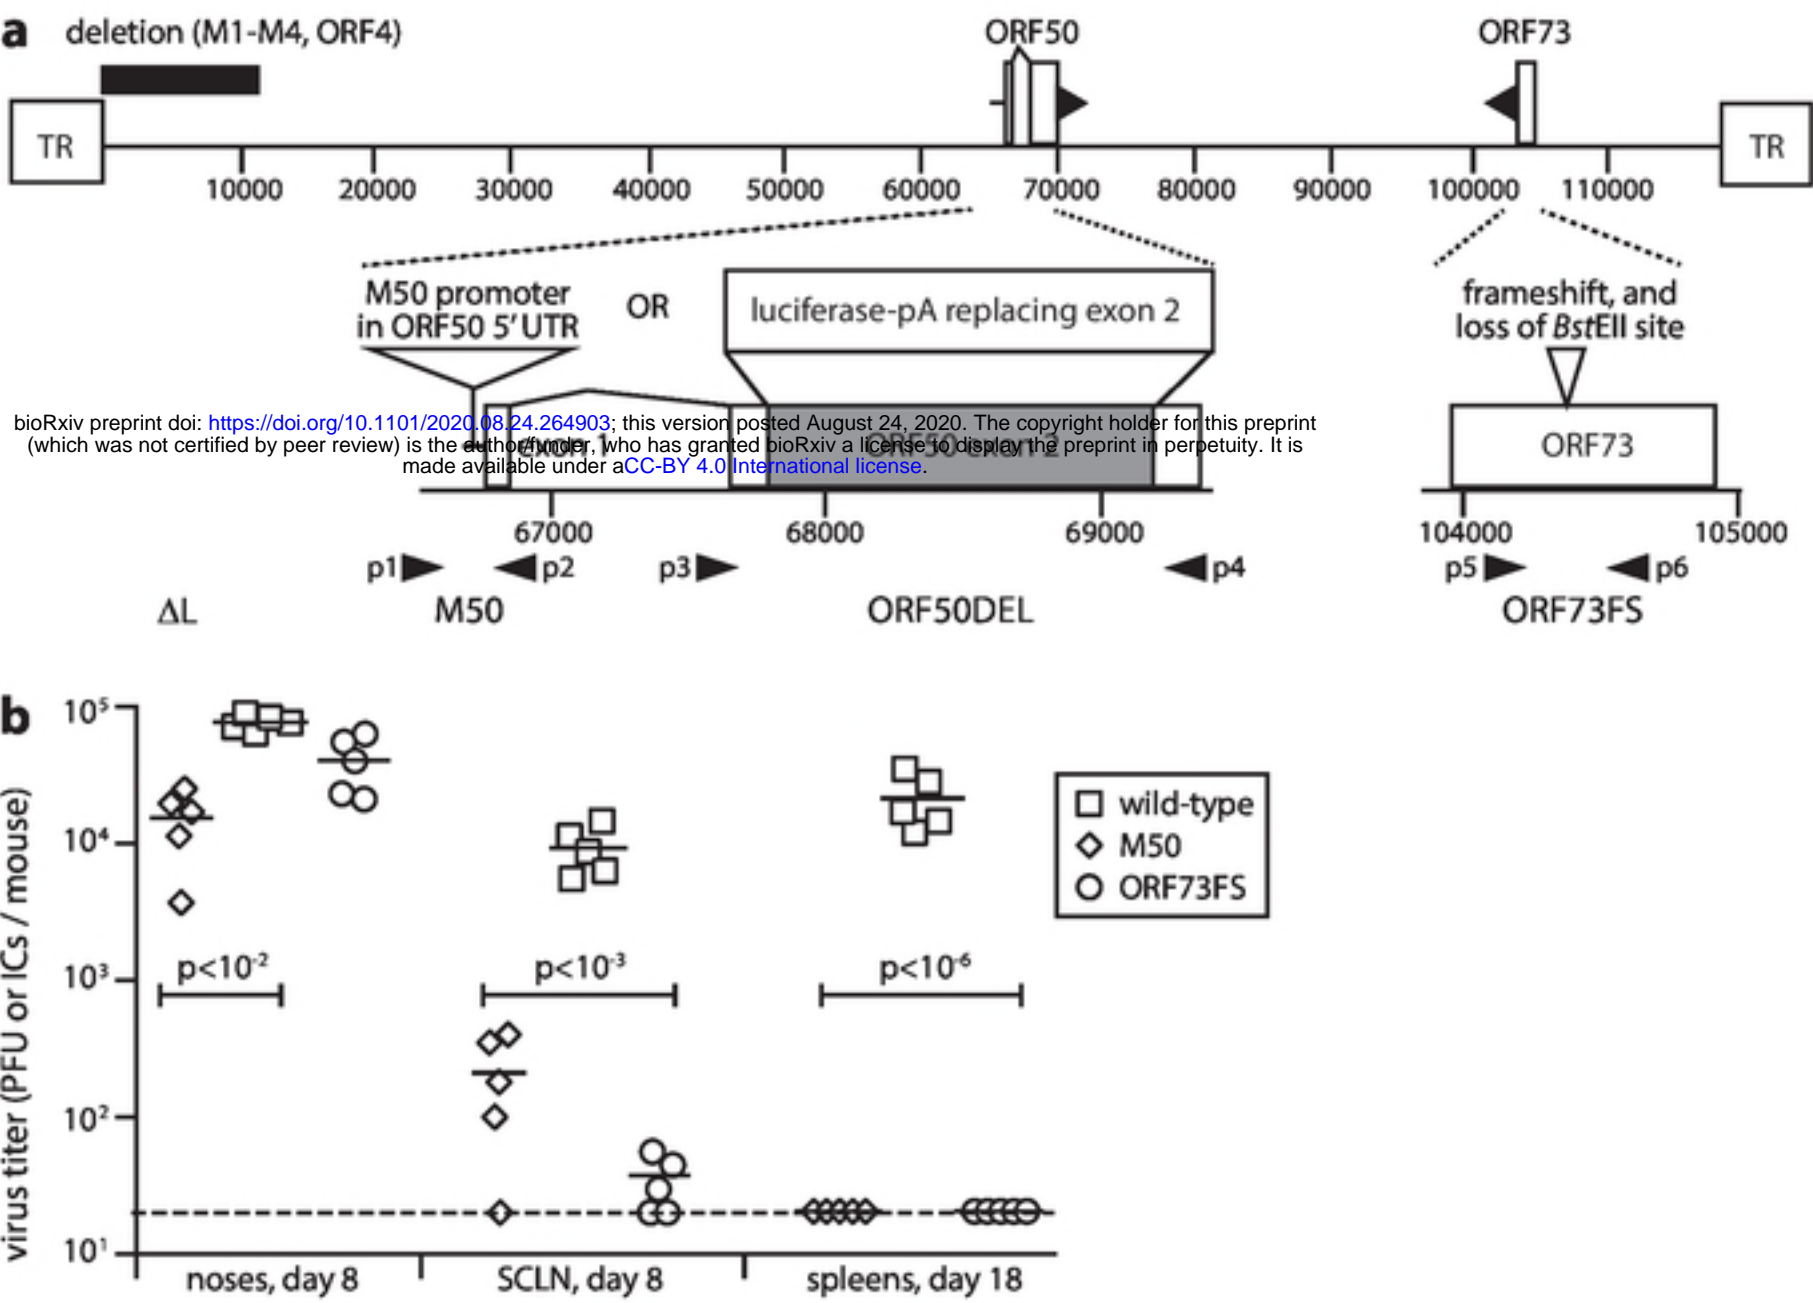

Figure 2

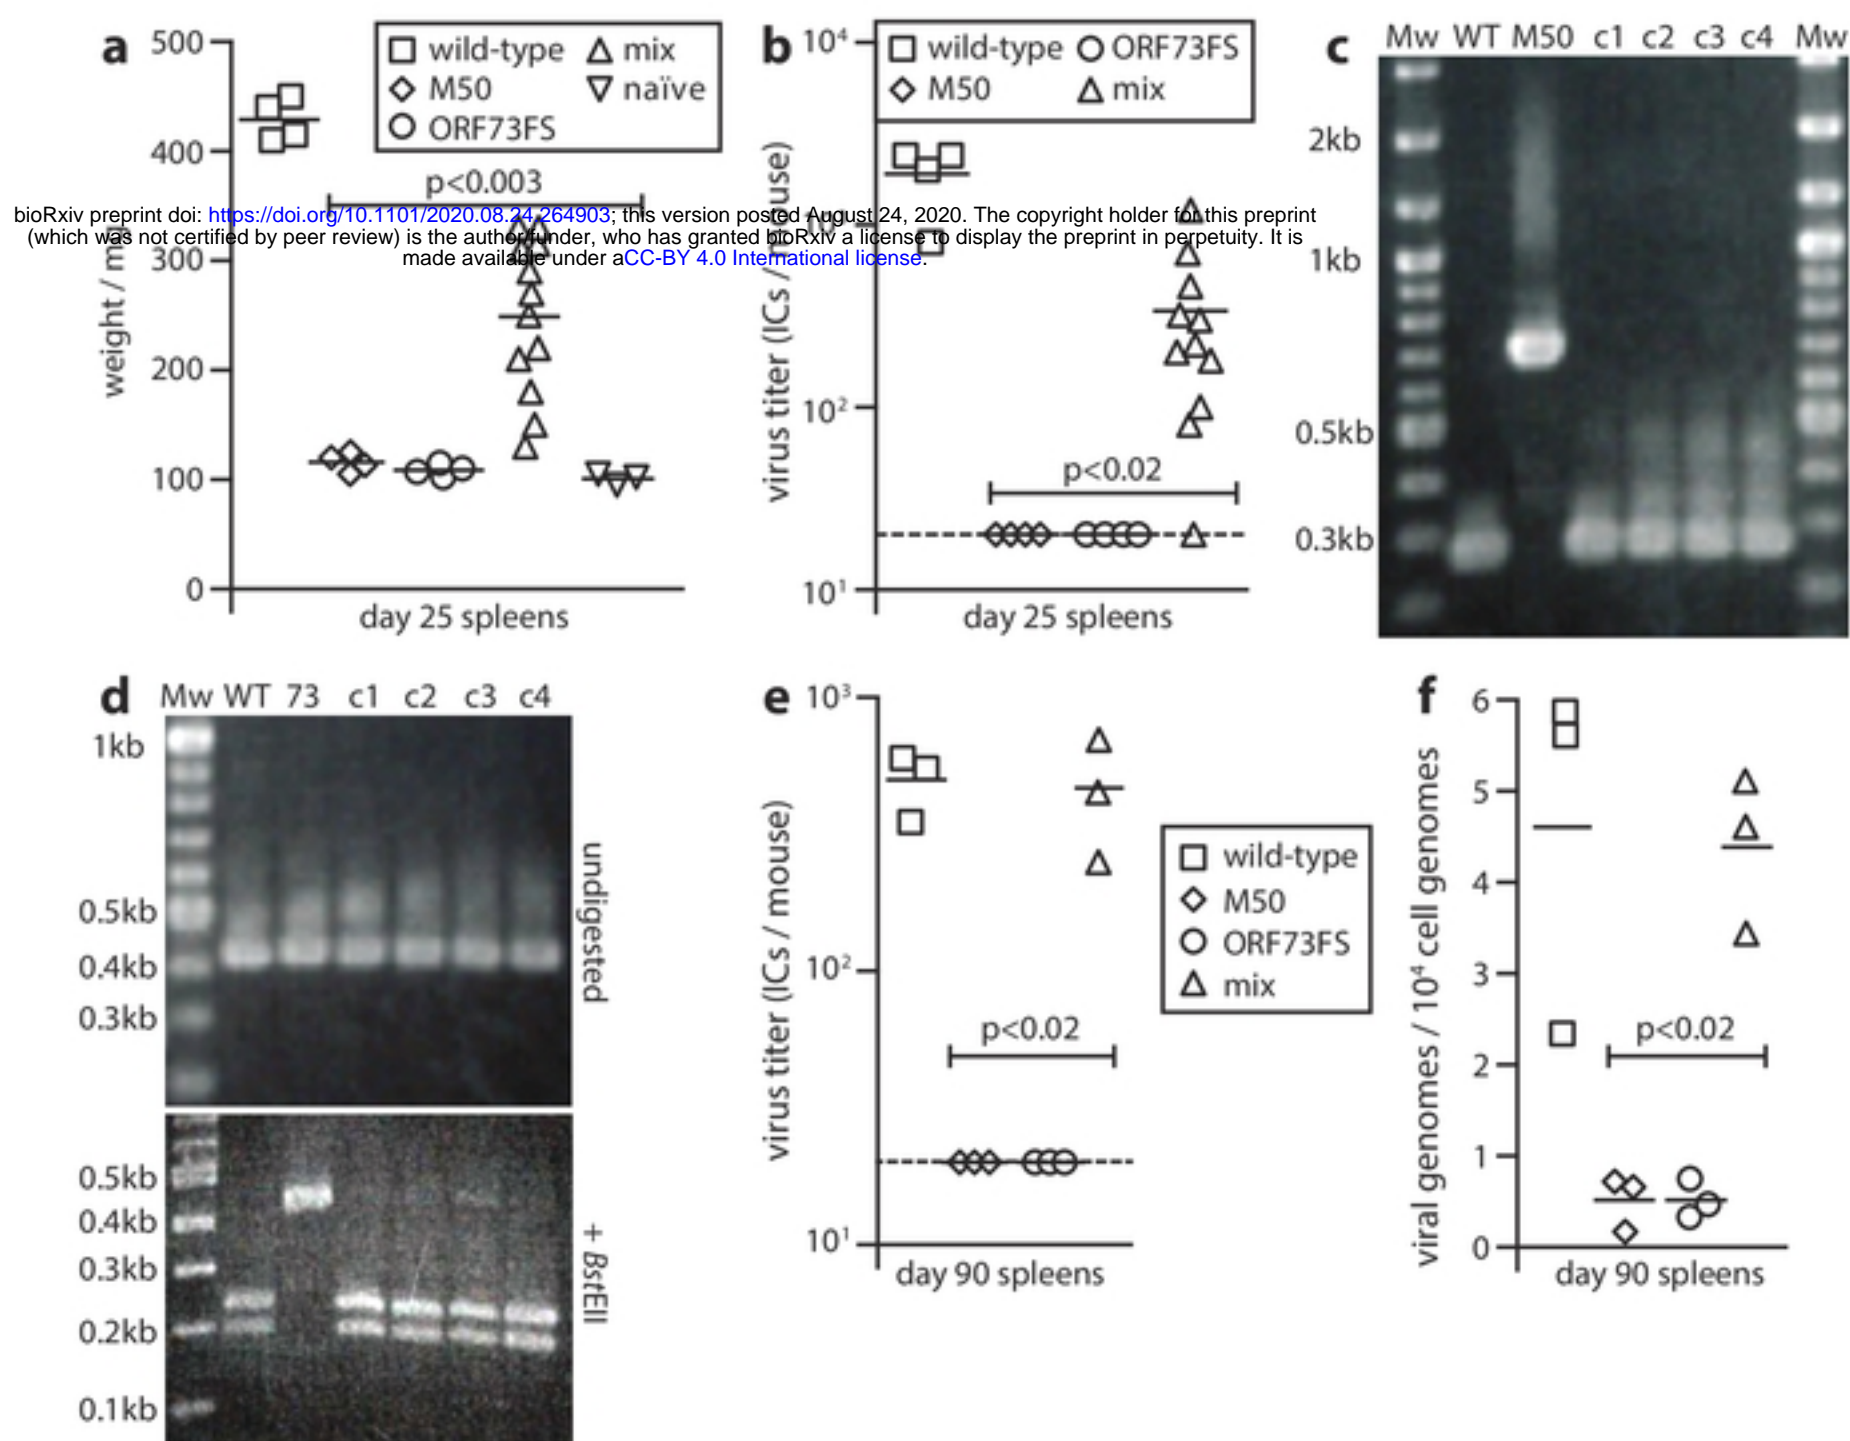

Figure 3

bioRxiv preprint doi: <https://doi.org/10.1101/2020.08.24.264903>; this version posted August 24, 2020. The copyright holder for this preprint (which was not certified by peer review) is the author/funder, who has granted bioRxiv a license to display the preprint in perpetuity. It is made available under aCC-BY 4.0 International license.

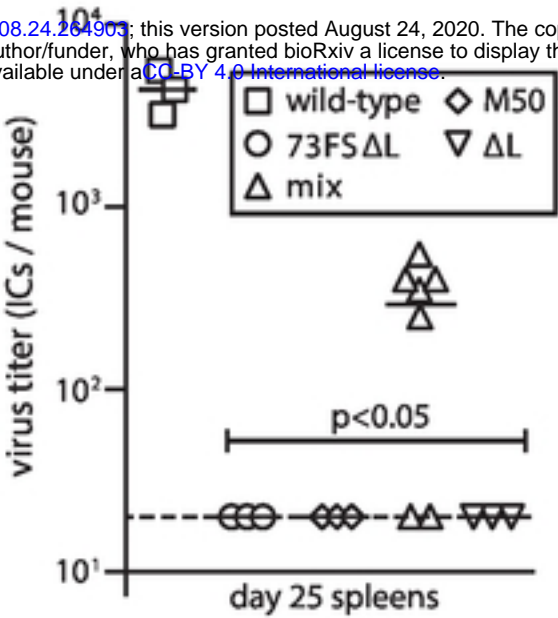

Figure 4

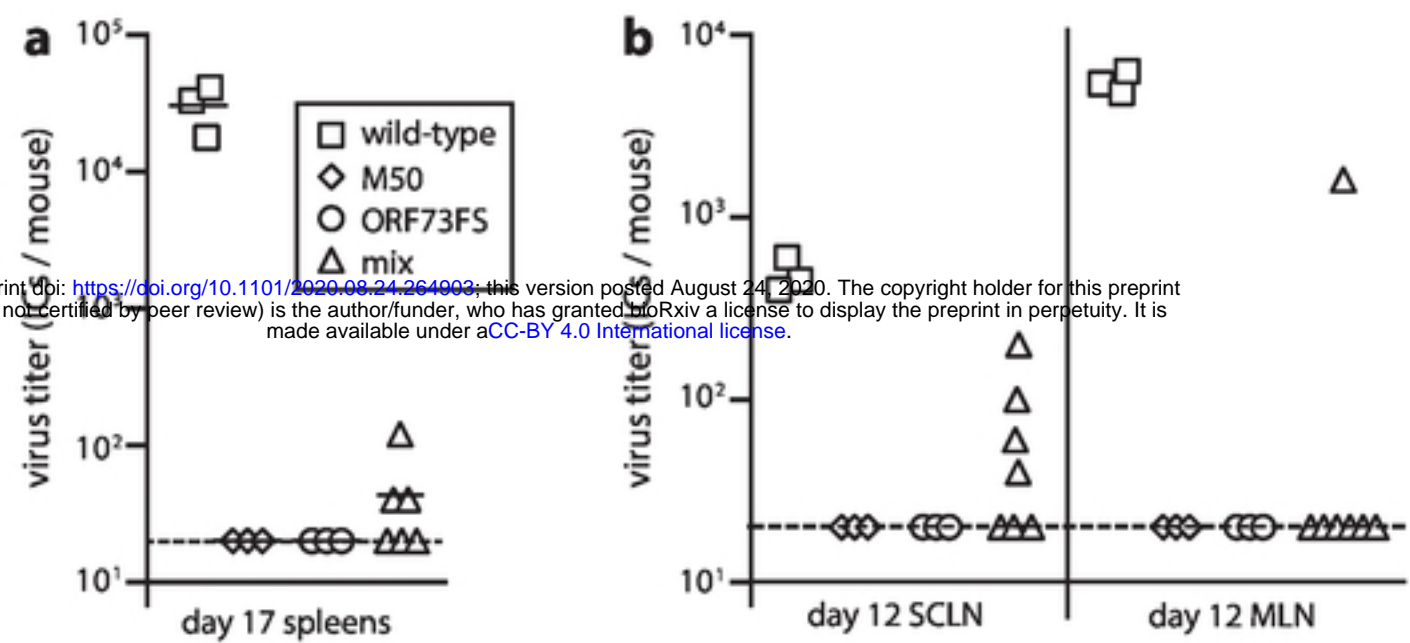



**Figure 5**

bioRxiv preprint doi: <https://doi.org/10.1101/2020.08.24.264903>; this version posted August 24, 2020. The copyright holder for this preprint (which was not certified by peer review) is the author/funder, who has granted bioRxiv a license to display the preprint in perpetuity. It is made available under aCC-BY 4.0 International license.

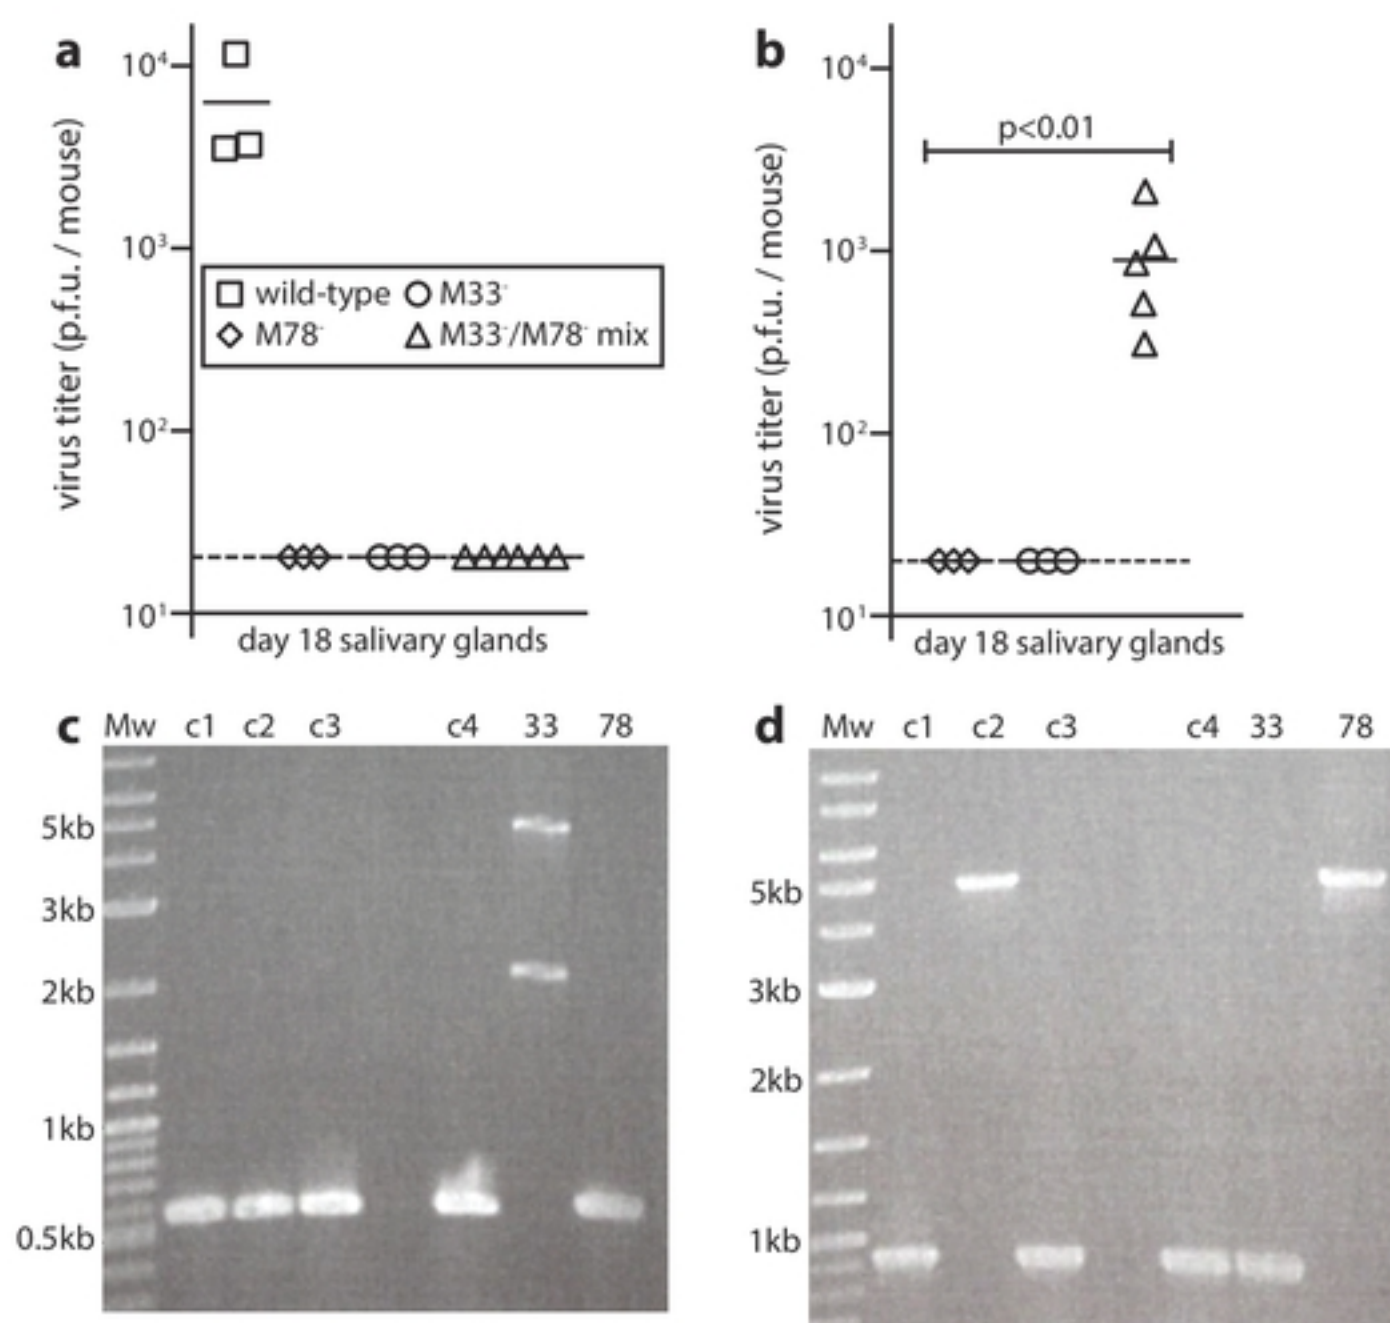

Figure 6

bioRxiv preprint doi: <https://doi.org/10.1101/2020.08.24.264903>; this version posted August 24, 2020. The copyright holder for this preprint (which was not certified by peer review) is the author/funder, who has granted bioRxiv a license to display the preprint in perpetuity. It is made available under aCC-BY 4.0 International license.

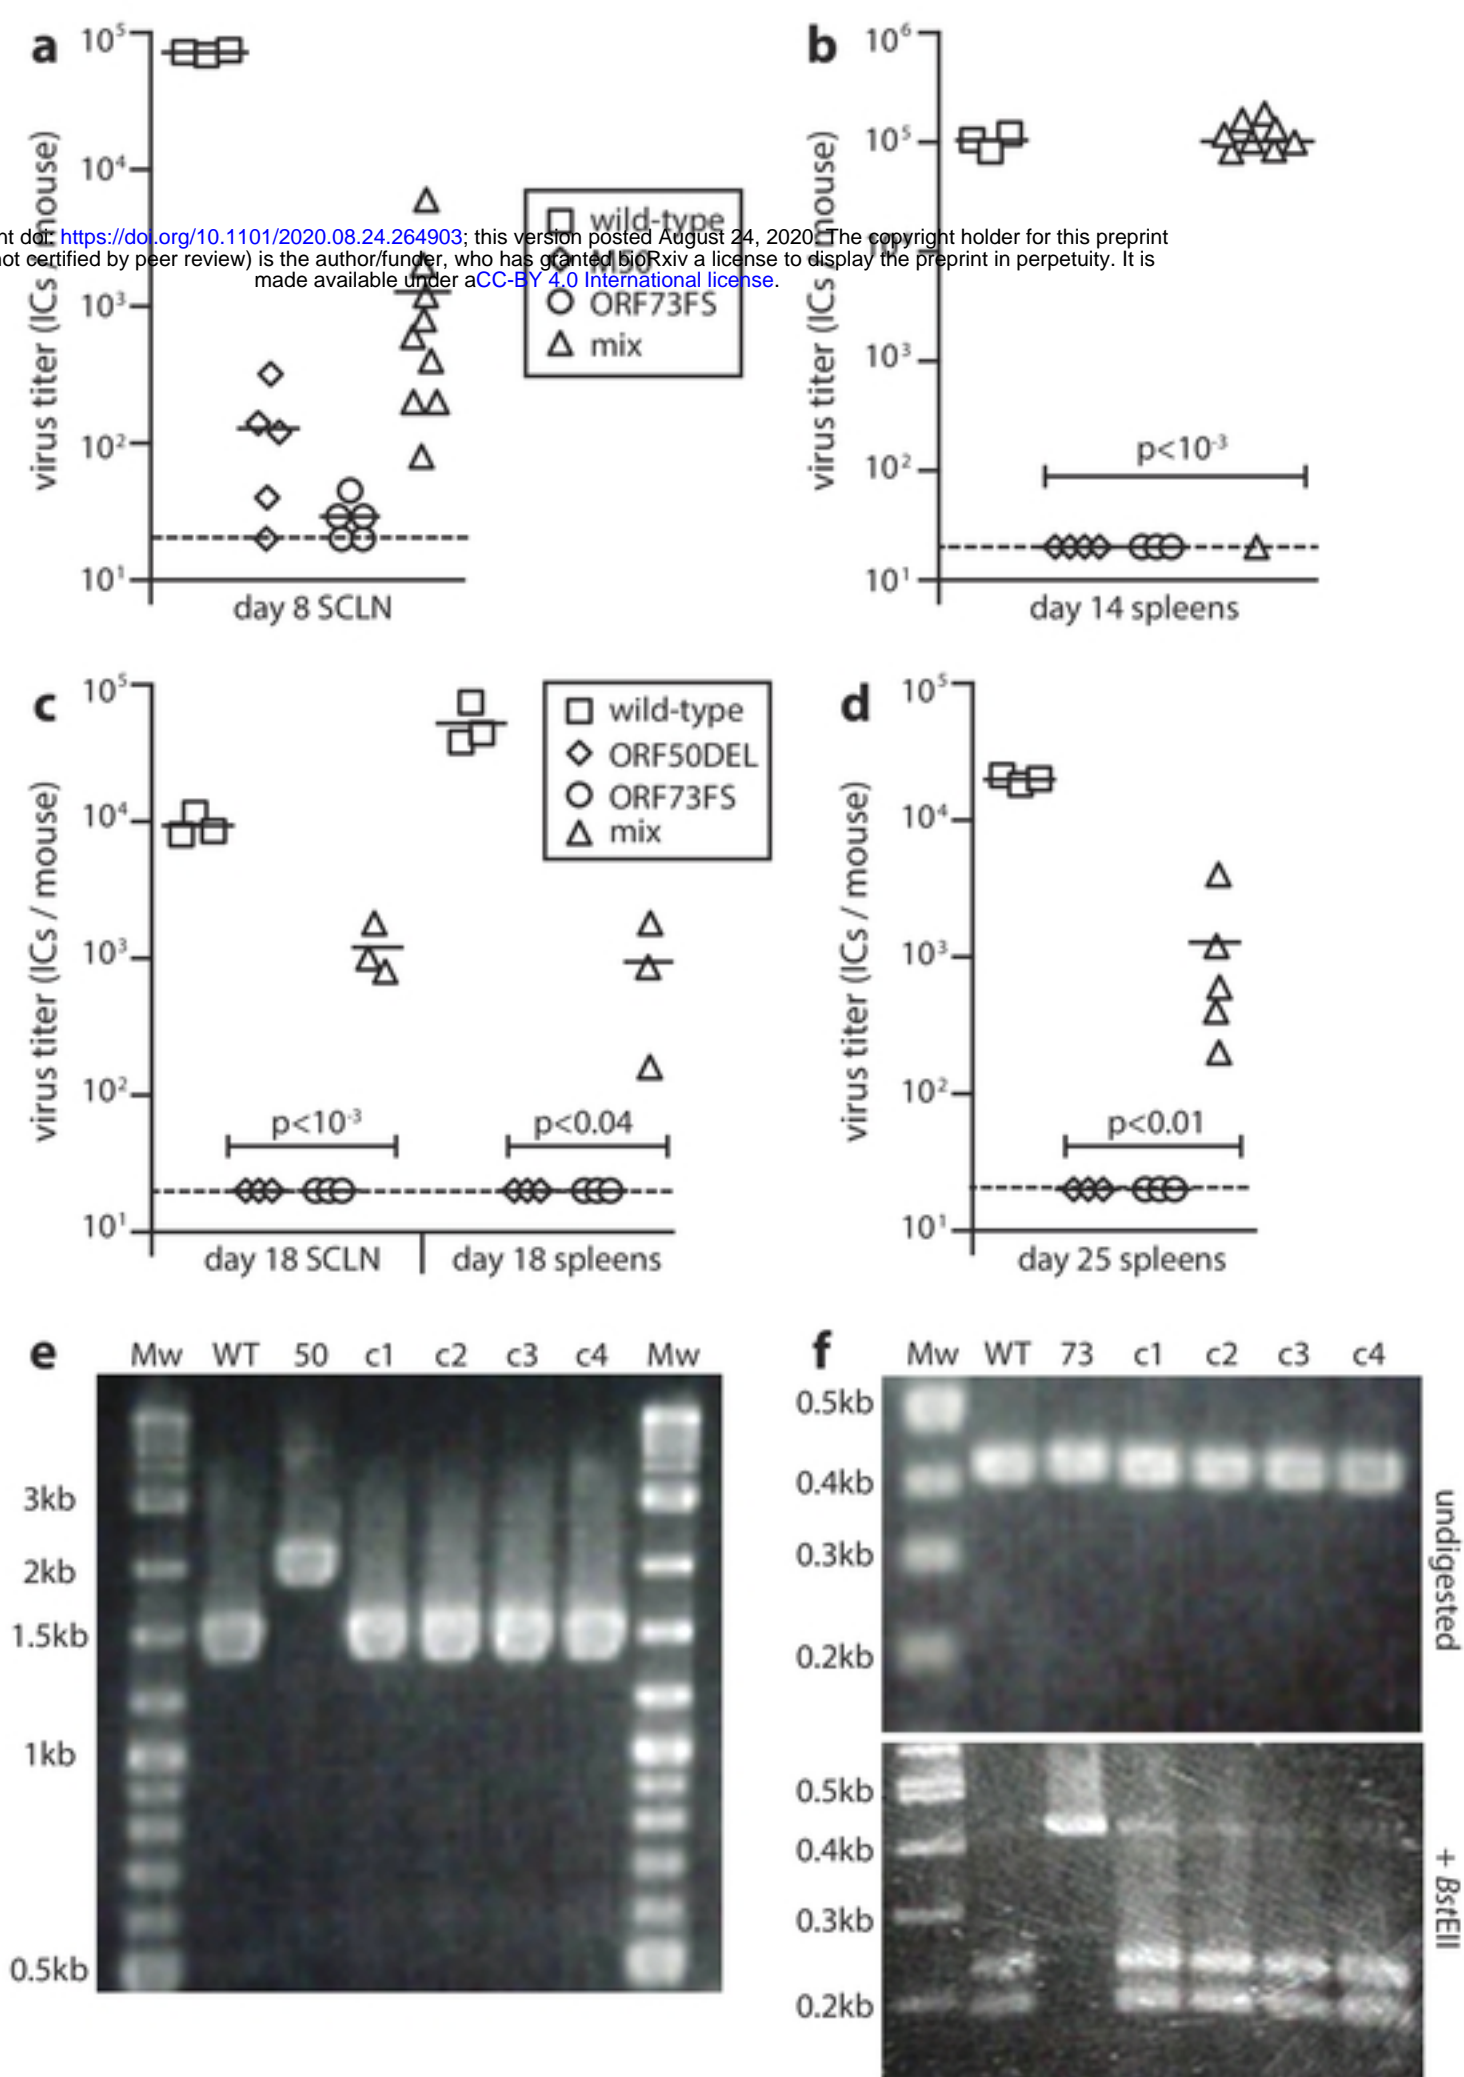

Figure 7

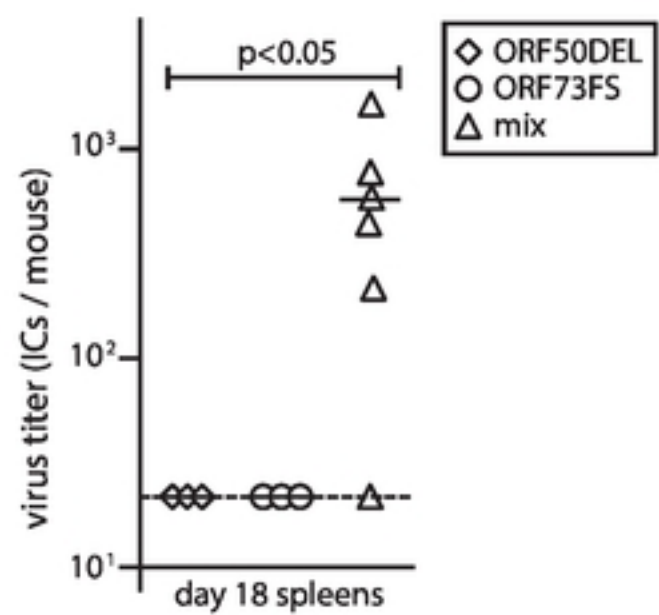

Figure 8

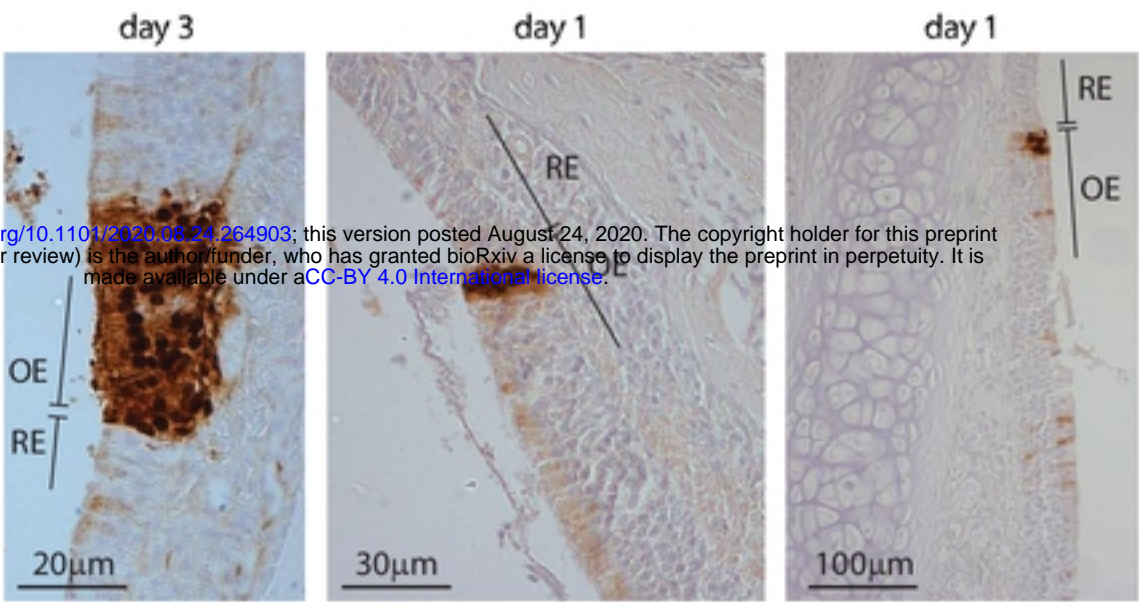

bioRxiv preprint doi: <https://doi.org/10.1101/2020.08.24.264903>; this version posted August 24, 2020. The copyright holder for this preprint (which was not certified by peer review) is the author/funder, who has granted bioRxiv a license to display the preprint in perpetuity. It is made available under aCC-BY 4.0 International license.
